# Supplementary material for: Zero-valent metal catalyzed radical-induced adjustable removal/modification of thiocarbonylthio end groups of RAFT polymer at ambient temperature
Source: Royal Society of Chemistry journal article supplement (doi:10.1039/c2py20667f), 2012-09-25
Supplement: c2py20667f.pdf [file c2py20667f.pdf]

**Supporting Information to**  
**Zero-Valent Metal Catalyzed Radical-Induced Adjustable**  
**Removal/Modification of Thiocarbonylthio End Groups of RAFT**  
**Polymer at Ambient Temperature**

Xiaofei Zhang,<sup>a</sup> Wenxiang Wang,<sup>a</sup> Kai Guo,<sup>b</sup> Chrys Wesdemiotis,<sup>b,c</sup> Zhengbiao

Zhang\*<sup>a</sup> and Xiulin Zhu \*<sup>a</sup>

<sup>a</sup> Jiangsu Key Laboratory of Advanced Functional Polymer Design and Application, Department of Polymer Science and Engineering, College of Chemistry, Chemical Engineering and Materials Science, Soochow University, Suzhou 215123, China.

<sup>b</sup> Department of Polymer Science and <sup>c</sup> Chemistry, The University of Akron, Akron, Ohio 44325, United States

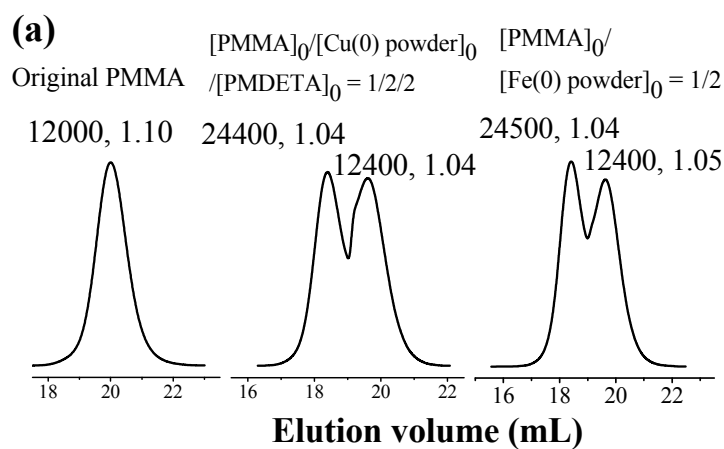

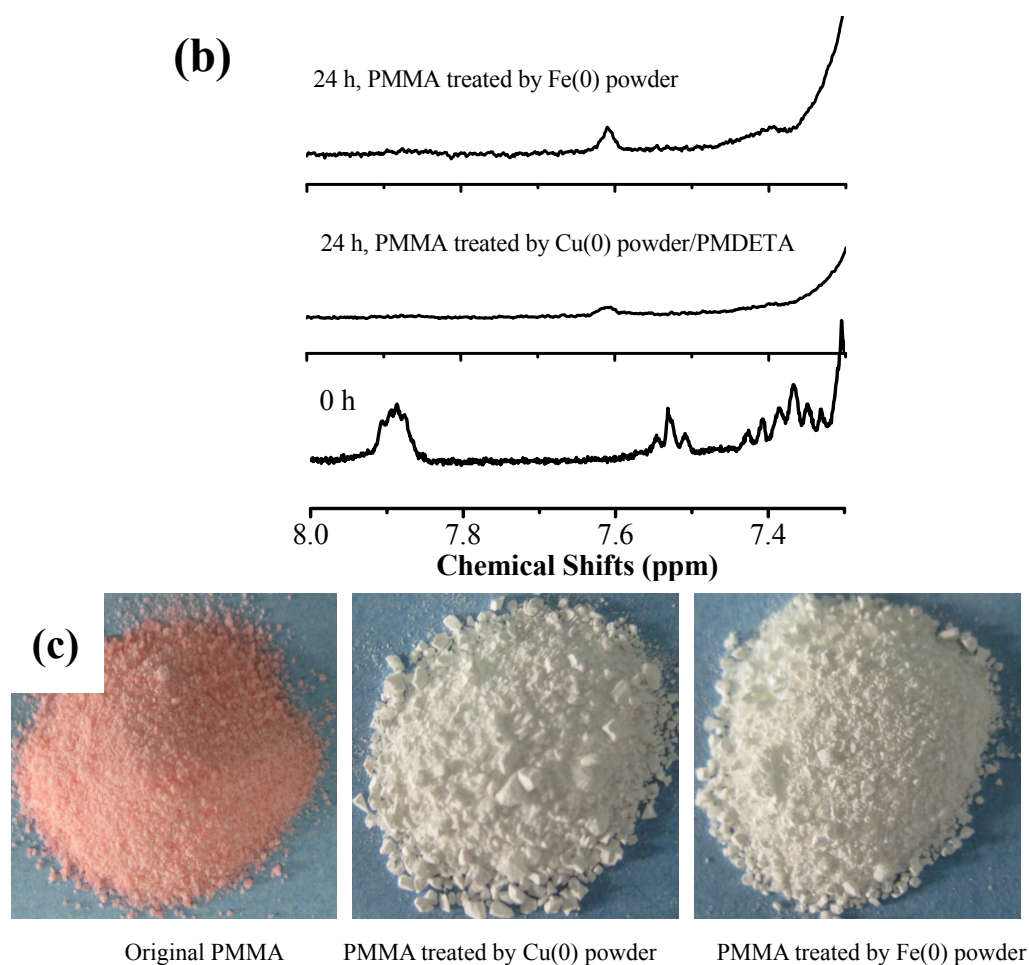

**Figure S1.** Original PMMA:  $[MMA]_0/[CPDB]_0/[AIBN]_0 = 500/5/1$ , time = 11 h, Conversion = 90.3 %, temperature = 60 °C, MMA = 5 mL, toluene = 2.0 mL; Treated Conditions:  $[PMMA]_0/[Cu(0) \text{ powder}]_0/[PMDETA]_0 = 1/2/2$ , PMMA = 0.6902 g, DMF = 4.0 mL; 24 h, 25 °C;  $[PMMA]_0/[Fe(0) \text{ powder}]_0 = 1/2$ , PMMA = 0.6902 g, DMF = 4.0 mL, 24 h, 25 °C; (a) SEC evolutions of the original PMMA and treated PMMA. (b) Enlarged  $^1H$  NMR spectra of the original PMMA and treated PMMA. (c) Photographs of PMMA before and after treatment.

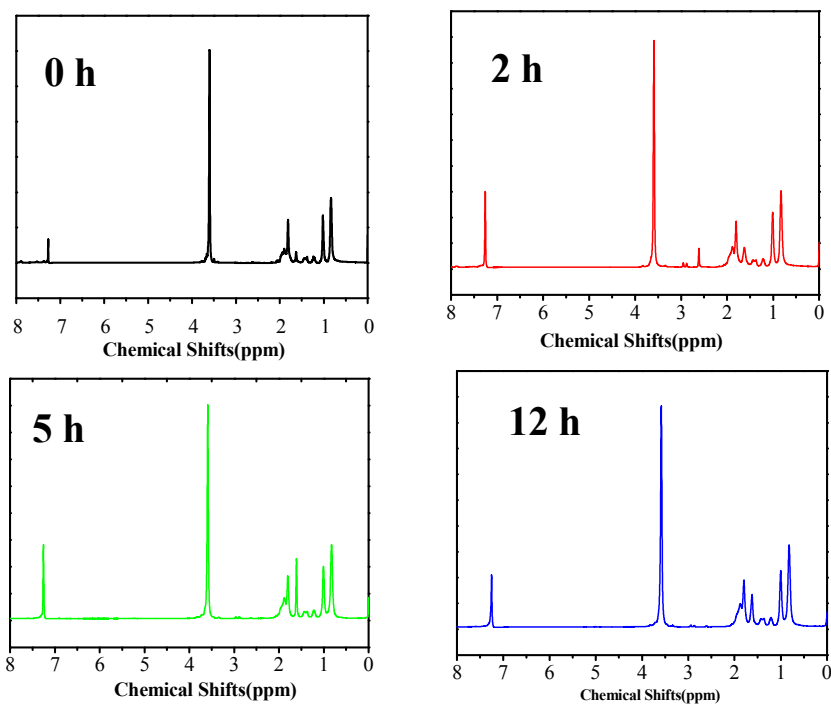

**Figure S2.** Full <sup>1</sup>H NMR Spectra before and after the treatment of PMMA catalyzed by Cu(0) powder/TEMPO (Figure 1 in main text).

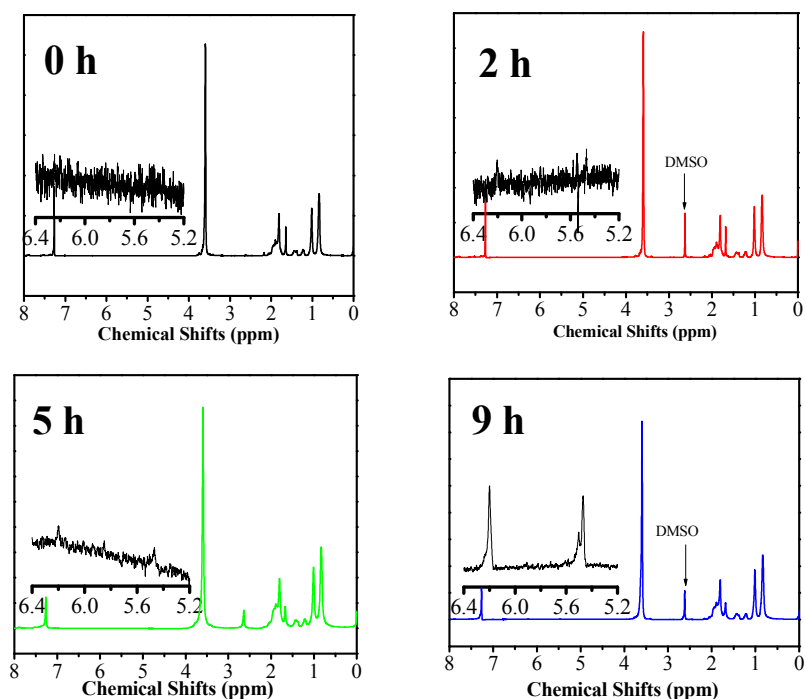

**Figure S3.** Full <sup>1</sup>H NMR Spectra before and after the treatment of PMMA catalyzed by Cu(0) powder/TEMPO (Figure 2 in main text).

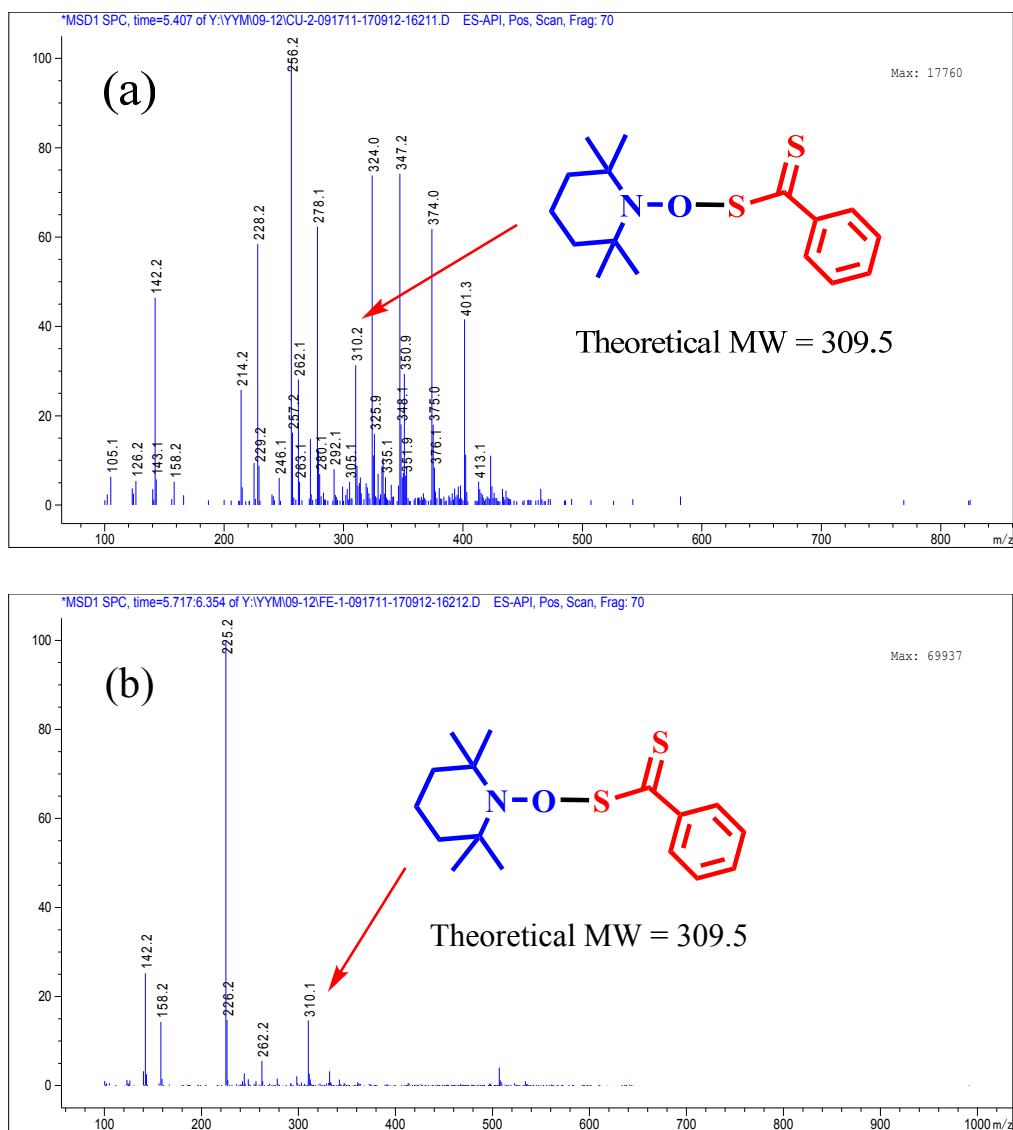

**Figure S4.** Liquid chromatography-mass spectrometric (LC-MS) analysis of resultants from the control experiments under: (a)  $[\text{CPDB}]_0/[\text{Cu}(0) \text{ powder}]_0/[\text{PMDETA}]_0/[\text{TEMPO}]_0 = 1/5/5/5$ , CPDB = 0.2 g, DMF = 1 mL, 12 h, 25 °C; (b)  $[\text{CPDB}]_0/[\text{Fe}(0) \text{ powder}]_0/[\text{TEMPO}]_0 = 1/1/5$ , CPDB = 0.2 g, DMF = 1 mL, 24 h, 25 °C.

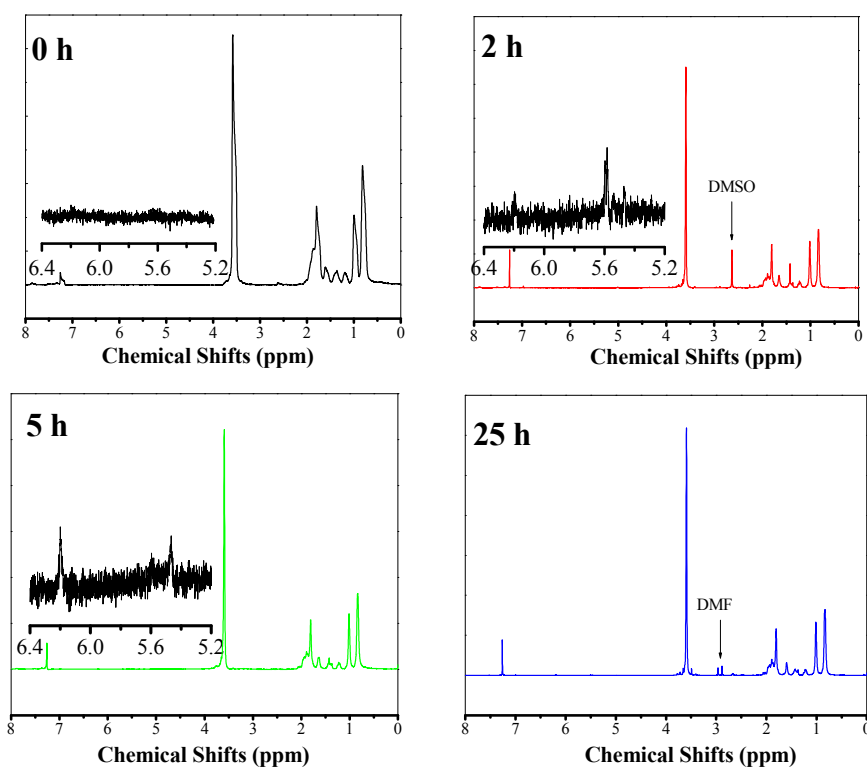

**Figure S5.** Full  $^1\text{H}$  NMR Spectra before and after the treatment of PMMA catalyzed by Cu(0) wire/TEMPO (Figure 3 in main text).

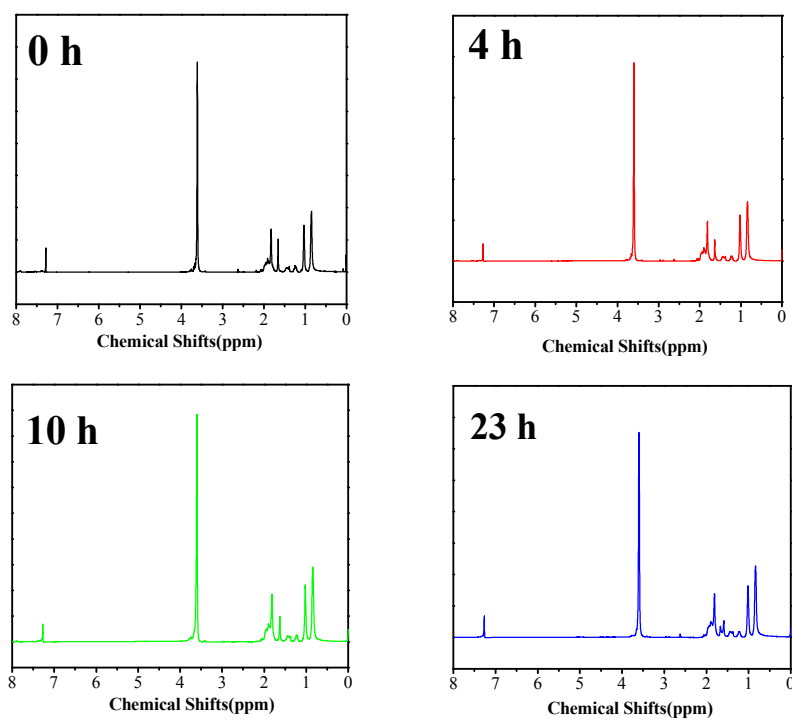

**Figure S6.** Full  $^1\text{H}$  NMR Spectra before and after the treatment of PMMA catalyzed by Fe(0) powder/TEMPO (Figure 6 in main text).

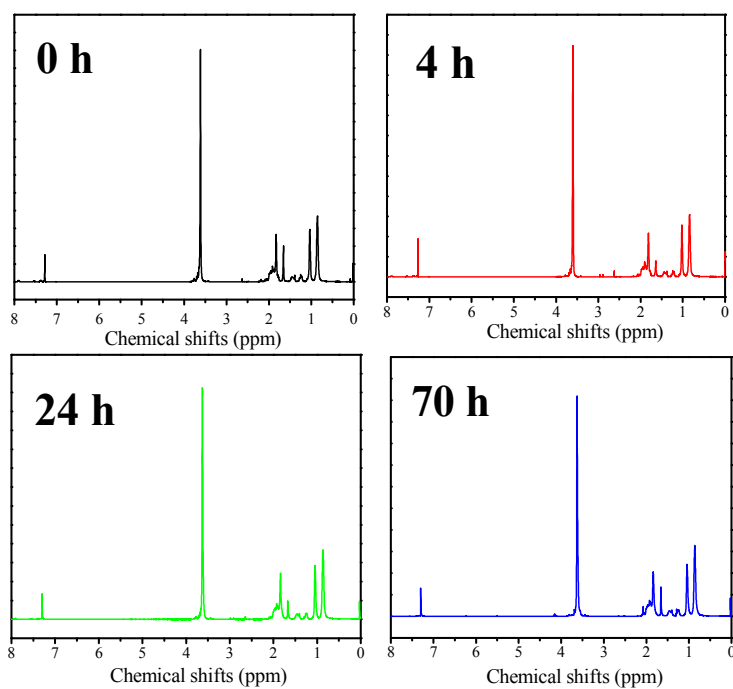

**Figure S7.** Full  $^1\text{H}$  NMR Spectra before and after the treatment of PMMA catalyzed by Fe(0) powder/TEMPO (Figure 7 in main text).

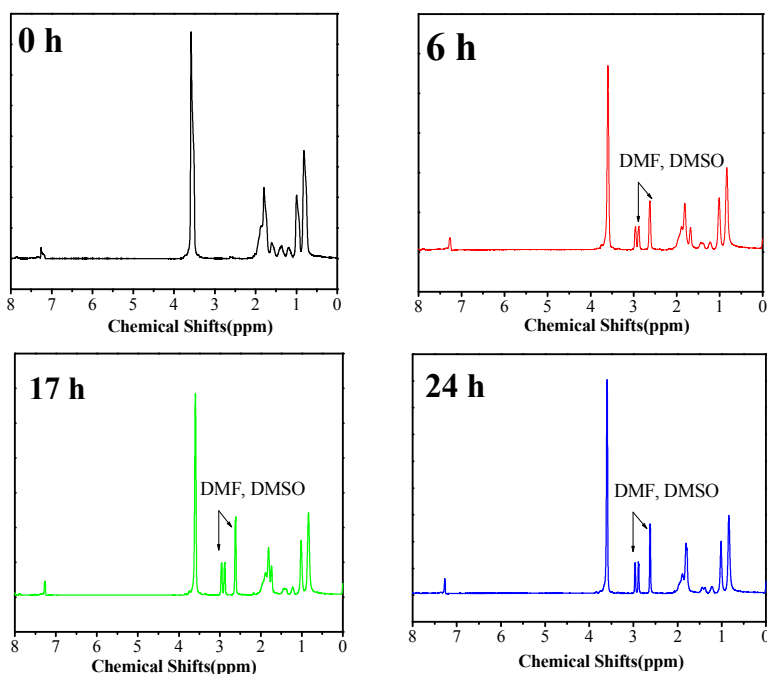

**Figure S8.** Full  $^1\text{H}$  NMR Spectra before and after the treatment of PMMA catalyzed by Fe(0) powder/TEMPO (Figure 8 in main text).

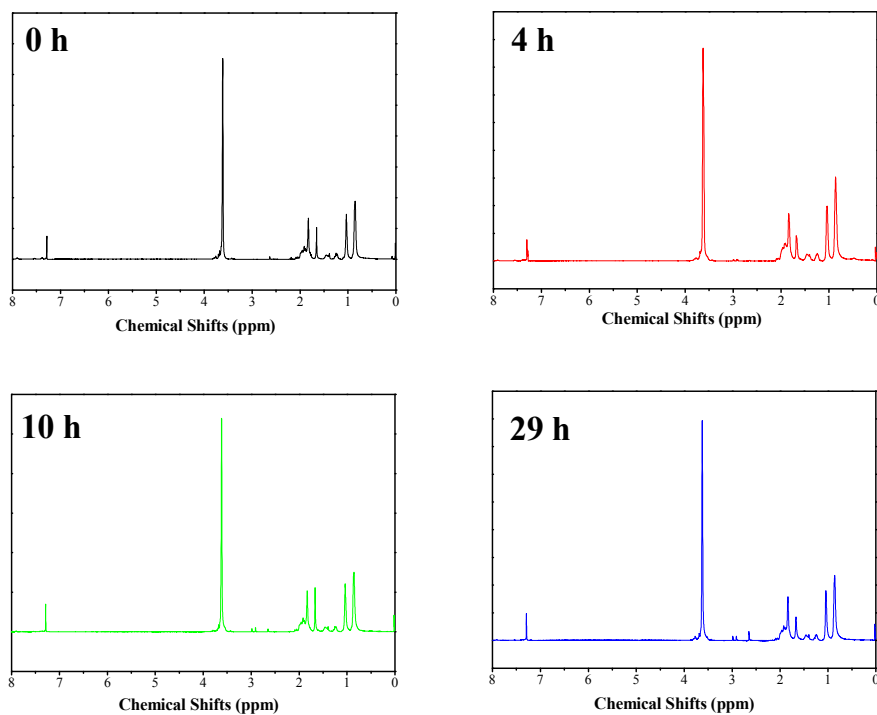

**Figure S9.** Full  $^1\text{H}$  NMR Spectra before and after the treatment of PMMA catalyzed by Fe(0) wire/TEMPO (Figure 9 in main text).

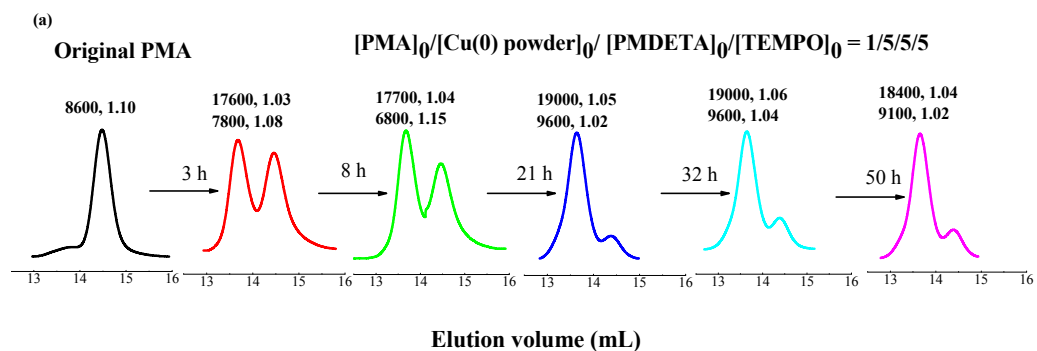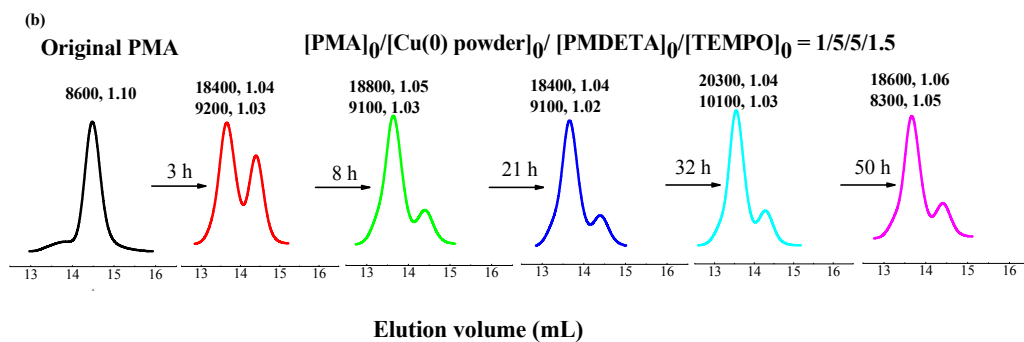

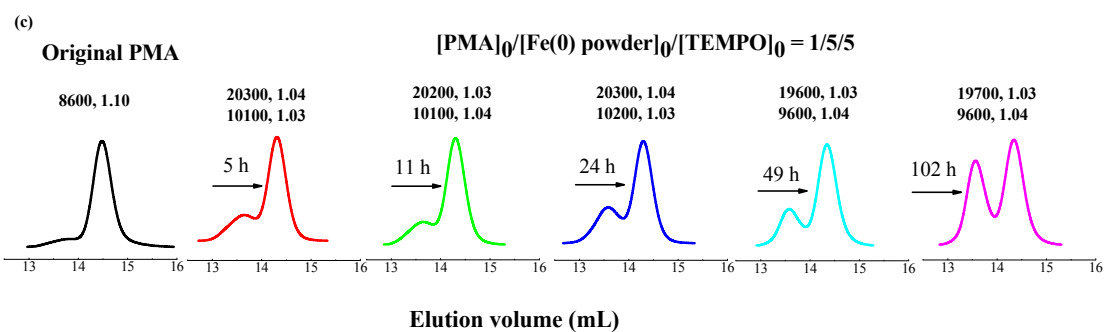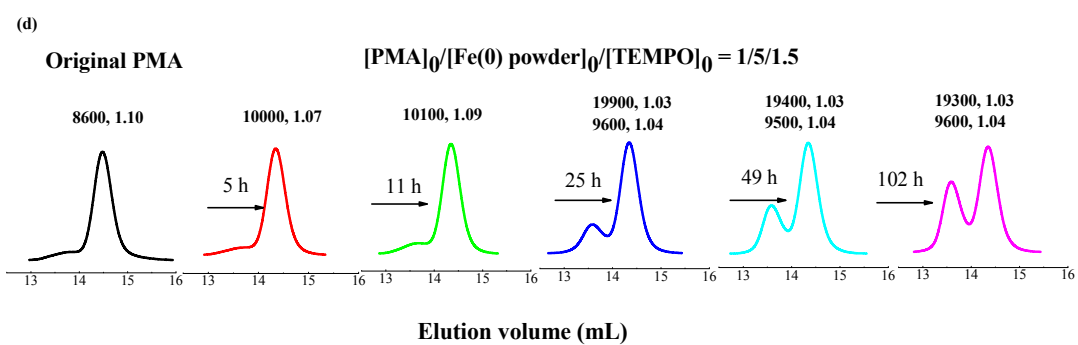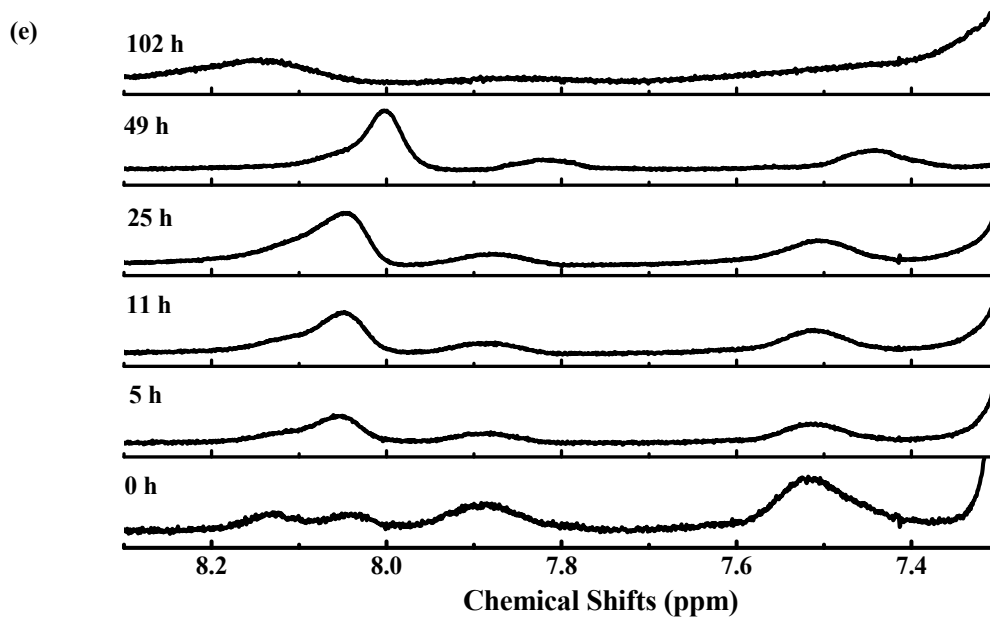



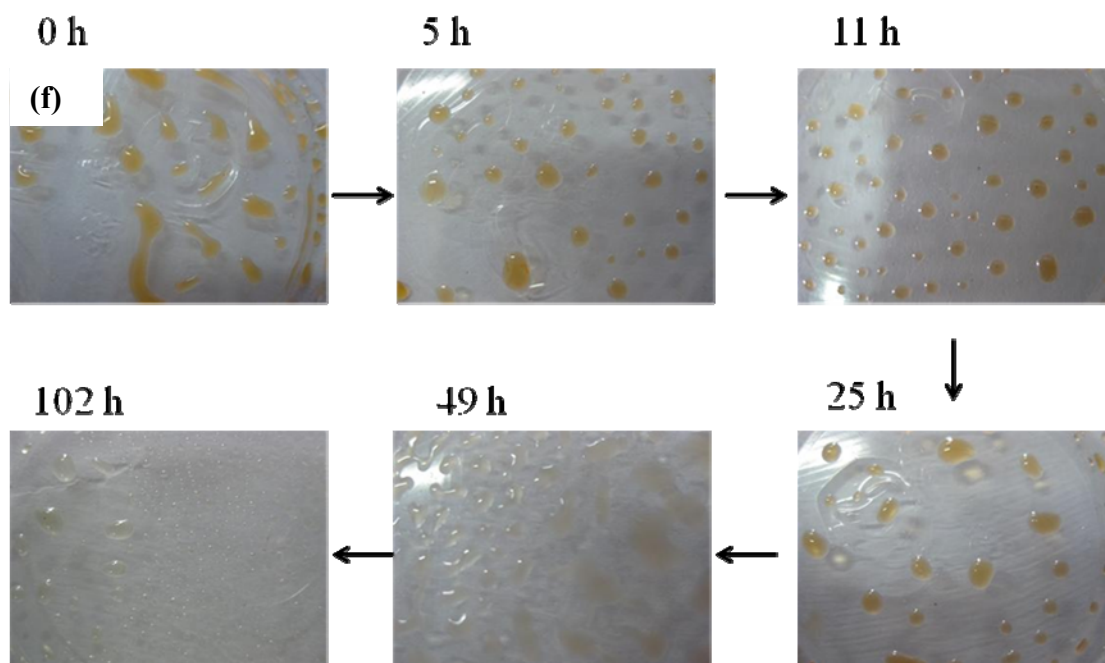

**Figure S10.** Original PMA:  $[MA]_0/[CPDN]_0/[AIBN]_0 = 500/5/1$ , Time = 24 h, Conversion = 72.5 %, temperature = 60 °C, MA = 12 mL, toluene = 4.0 mL; Treated conditions, PMA = 0.2 g, DMF = 1.0 mL, 25 °C;: (a)  $[PMA]_0/[Cu(0) \text{ powder}]_0/[PMDETA]_0/[TEMPO]_0 = 1/5/5/5$ , PMA = 0.2 g, DMF = 1.0 mL; (b)  $[PMA]_0/[Cu(0) \text{ powder}]_0/[PMDETA]_0/[TEMPO]_0 = 1/5/5/1.5$ ; (c)  $[PMA]_0/[Fe(0) \text{ powder}]_0/[TEMPO]_0 = 1/5/5$ ; (d)  $[PMA]_0/[Fe(0) \text{ powder}]_0/[TEMPO]_0 = 1/5/1.5$ ; (e) Enlarged  $^1H$  NMR spectra of the original PMA and treated PMA as (d); (f) Photographs of PMA before and after treatment as (d).

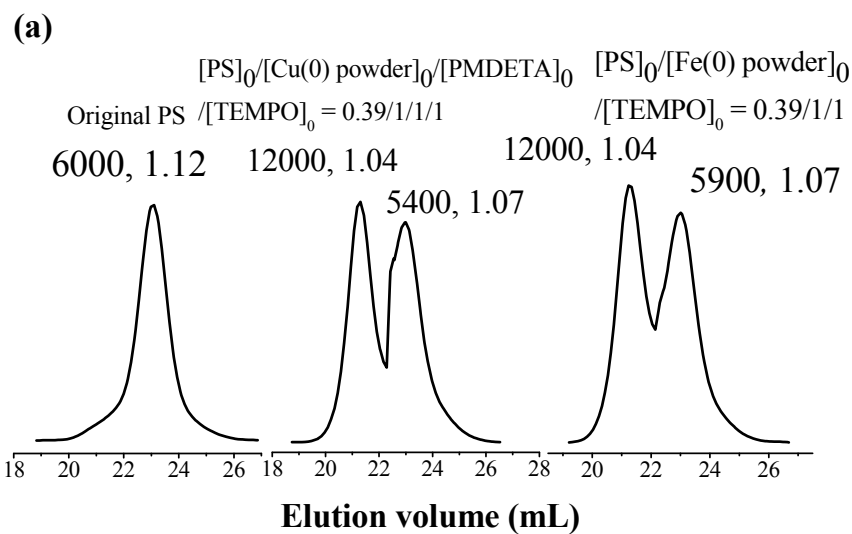

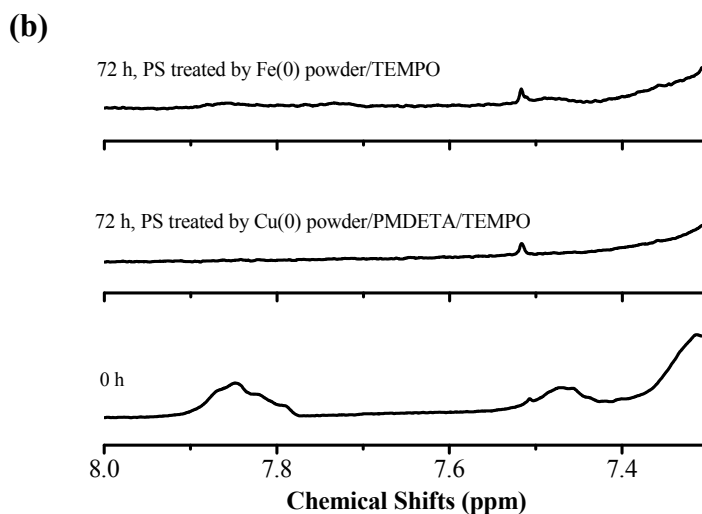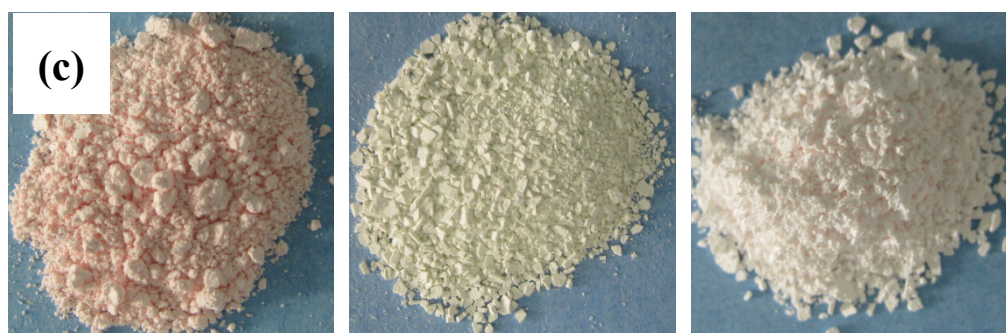

**Figure S11.** Original PS:  $[\text{St}]_0/[\text{CPDB}]_0/[\text{AIBN}]_0 = 500/5/1$ , time = 71 h, Conversion = 56.7 %, temperature = 60 °C, St = 2.0 mL, toluene = 1.0 mL; Treated conditions: PS treated by Cu(0) powder/PMDETA:  $[\text{PS}]_0/[\text{Cu}(0) \text{ powder}]_0/[\text{PMDETA}]_0/[\text{TEMPO}]_0 = 0.39/1/1/1$ , time = 72 h, PS = 0.2334 g, DMF = 5 mL, 25 °C; PS treated by Fe(0) powder:  $[\text{PS}]_0/[\text{Fe}(0) \text{ powder}]_0/[\text{TEMPO}]_0 = 0.39/1/1$ , time = 72 h, PS = 0.2334 g, DMF = 5.0 mL, 25 °C; (a) SEC evolutions of the original PS and treated PS. (b) Enlarged  $^1\text{H}$  NMR spectra of the original PS and treated PS. (c) Photographs of PS before and after treatment.
